# Supplementary material
Source: Springer Nature journal article supplement (https://www.springermedizin.de/resource/supplementary/12913_2010_1393_MOESM1_ESM.pdf/9528042)
Supplement: MOESM1 [file 9528042]

Inception medical record cohort  
3656 patients with newly diagnosed CRC

944 incomplete colonoscopy data (from 2 sites)

324 missing surgery or stage data

373 stage IV

38 had colonoscopy within 60 days after surgery

424 had surgery > 1 month after diagnosis (censored)

122 died within 14 months after surgery

8 recurred (not after colonoscopy)

1423 survivors
